# Supplementary material for: Experimental disclosing the composition- and structure-dependent deep-level defect in photovoltaic antimony trisulfide materials
Source: Research Square preprint supplement (doi:10.21203/rs.3.rs-200212/v1), 2021-02-09
Supplement: Supplementary file 1 [file e689e5510aaa3d2f75038e1d.pdf]

# Supplementary Information

## Experimental disclosing the composition- and structure-dependent deep-level defect in photovoltaic antimony trisulfide materials

Weitao Lian<sup>1</sup> Chenhui Jiang<sup>1</sup>, Yiwei Yin<sup>1</sup>, Rongfeng Tang<sup>1</sup>, Gang Li<sup>1</sup>, Lijian Zhang<sup>1</sup>, Bo Che<sup>1</sup> and Tao Chen<sup>1\*</sup>

<sup>1</sup>Hefei National Laboratory for Physical Sciences at Microscale, CAS Key Laboratory of Materials for Energy Conversion, Department of Materials Science and Engineering, School of Chemistry and Materials Science, University of Science and Technology of China, Hefei, Anhui 230026, P. R. China

\*E-mail: tchenmse@ustc.edu.cn

Supplementary Table 1 Characterisation of the element composition of Sb-rich and S-rich films deposited on soda-lime glass via energy dispersive X-ray spectroscopy (EDS).

| Films   | Sb at% | S at% | S/Sb | S/Sb (average) |
|---------|--------|-------|------|----------------|
| Sb-rich | 43.70  | 56.30 | 1.29 | 1.28           |
|         | 43.90  | 56.10 | 1.28 |                |
|         | 43.30  | 55.90 | 1.29 |                |
|         | 43.80  | 56.20 | 1.28 |                |
|         | 44.10  | 55.90 | 1.27 |                |
| S-rich  | 38.40  | 61.60 | 1.60 | 1.55           |
|         | 39.80  | 60.20 | 1.51 |                |
|         | 38.20  | 61.80 | 1.62 |                |
|         | 39.90  | 60.10 | 1.51 |                |
|         | 39.80  | 60.20 | 1.51 |                |

Supplementary Table 2 Fitting results of TAS monitored at 545 nm wavelength.

| Films   | $A_1$ | $t_1(\text{ns})$ | $A_2$ | $t_2(\text{ns})$ | $\tau(\text{ns})$ |
|---------|-------|------------------|-------|------------------|-------------------|
| Sb-rich | 0.40  | 0.31             | 0.60  | 3.99             | 3.8               |
| S-rich  | 0.09  | 0.38             | 0.91  | 18.69            | 18.7              |

Supplementary Table 3 Photovoltaic parameters of optimal Sb-rich and S-rich Sb<sub>2</sub>S<sub>3</sub> devices.

| Devices | $V_{oc}$ (V) | $J_{sc}$ (mA.cm <sup>-2</sup> ) | $FF$  | $\eta$ (%) | $R_s$ ( $\Omega$ ) | $R_{sh}$ ( $\Omega$ ) |
|---------|--------------|---------------------------------|-------|------------|--------------------|-----------------------|
| S-rich  | 0.74*        | 15.6                            | 52.9  | 6.1        | 106.3              | 6184.6                |
|         | 0.72         | 15.9*                           | 54.3* | 6.2*       | 100.4              | 6677.5                |
| Sb-rich | 0.68         | 15.4                            | 47.6  | 5.0        | 116.5              | 1509.3                |

(\* indicates the champion parameters.)

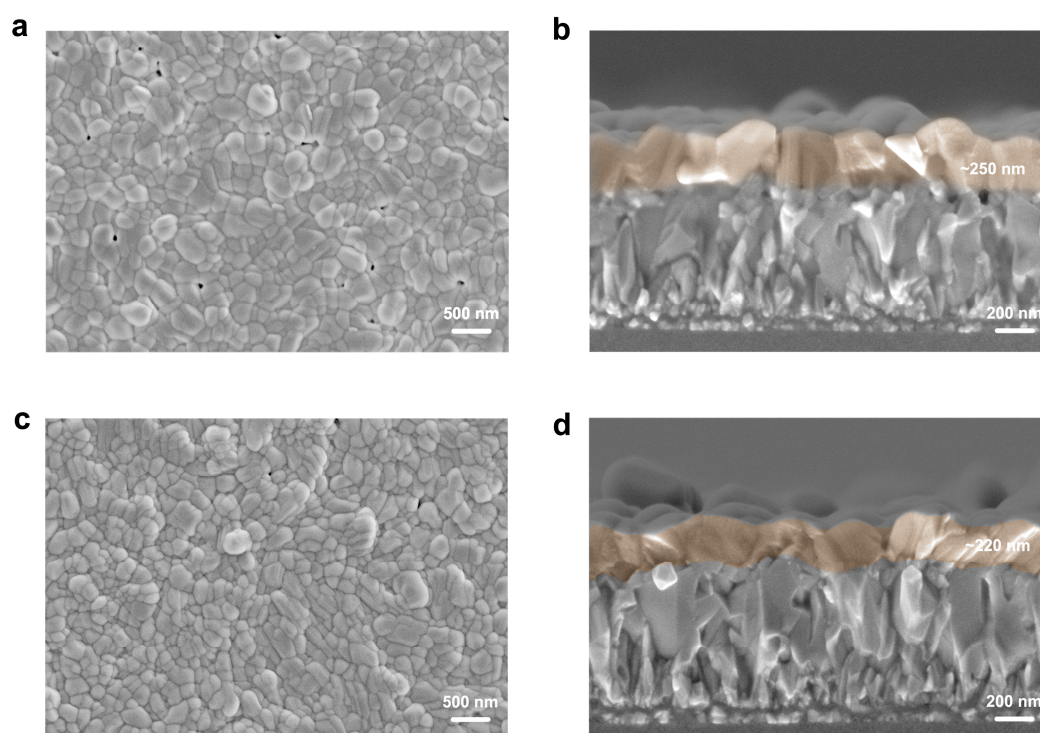

Supplementary Fig. 1 Films morphology characterizations. **a, b**, Surface and cross sectional morphology of Sb-rich Sb<sub>2</sub>S<sub>3</sub> film. **c, d**, Surface and cross sectional morphology of S-rich Sb<sub>2</sub>S<sub>3</sub> film.

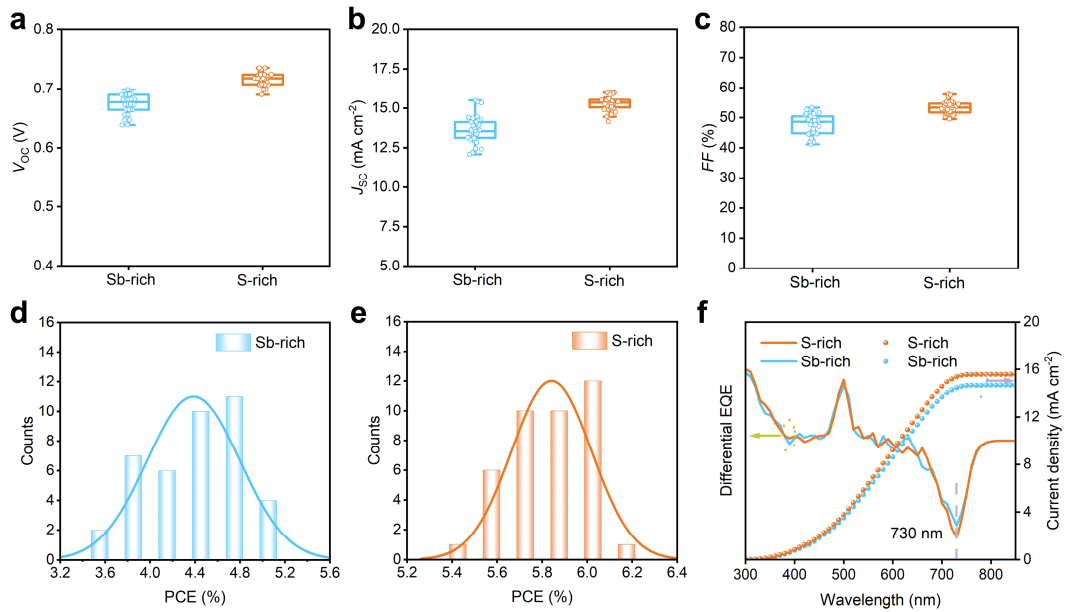

40

41 Supplementary Fig. 2 Device photovoltaic performance characterizations. **a-c**, Statistic  
 42  $V_{oc}$ ,  $J_{sc}$  and  $FF$  based on 40 individually fabricated Sb-rich and S-rich  $\text{Sb}_2\text{S}_3$  devices.  
 43 **d, e**, Statistic PCE distribution of 40 Sb-rich and S-rich  $\text{Sb}_2\text{S}_3$  devices. **f** Differential  
 44 EQE and integral current density of optimal Sb-rich and S-rich  $\text{Sb}_2\text{S}_3$  based solar cells.

45

#### 46 Supplementary note 1. Ultraviolet photoelectron spectroscopy.

47 To investigate the dependence of stoichiometry on the work function (Fermi level,  $E_F$ )  
 48 and band structure of  $\text{Sb}_2\text{S}_3$  films, we carried out ultraviolet photoelectron spectroscopy  
 49 (UPS) characterizations. According to the secondary electron cutoff (SEC) and valence  
 50 band (VB) position (Supplementary Fig. 3a and b), we calculate the  $E_F$  which are -3.95  
 51 eV and -4.12 eV, respectively for Sb-rich and S-rich  $\text{Sb}_2\text{S}_3$ . Furthermore, we find that  
 52 Sb-rich and S-rich  $\text{Sb}_2\text{S}_3$  share an identical band gap of 1.70 eV corresponding to 730  
 53 nm absorption onset (Supplementary Fig. 2f). Hence, the CBM and VBM are

determined to be -3.39 and -5.09 eV for S-rich  $\text{Sb}_2\text{S}_3$ . The CBM and VBM of Sb-rich  $\text{Sb}_2\text{S}_3$  are -3.40 and -5.10 eV, respectively. Particularly, it is noted that the introduction of S has no impacts on the band structure and band gap but  $E_F$  solely. Regarding the downshift of  $E_F$ , we attribute it to some reduced shallow donor dopants accompanying with S addition<sup>1</sup>. Specially, it is worth noting that the S-rich  $\text{Sb}_2\text{S}_3$  is still an n type semiconductor even if the  $E_F$  shift downward a little after S supplement.

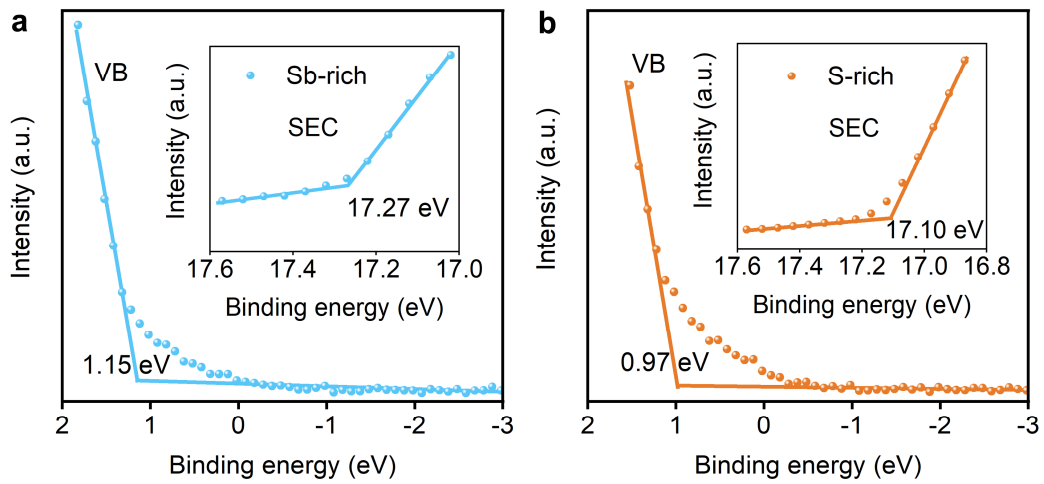

Supplementary Fig. 4 Band structure characterizations. **a, b**, Secondary electron (SEC) cutoff edge and valence band (VB) position of Sb-rich and S-rich  $\text{Sb}_2\text{S}_3$  films.

## Supplementary note 2. DLTS measurement background.

We conduct deep-level transient spectroscopy (DLTS) to detect the deep-level defects properties. Arrhenius plots obtained from DLTS are shown in Supplementary Fig. 4. The active energy ( $E_a$ ,  $E_C - E_T$  or  $E_T - E_V$ ) and capture cross section of electron traps and hole traps can be calculated by the Arrhenius equations (1) and (2)<sup>2</sup>,

$$\ln(\tau_e v_{th,n} N_C) = \frac{E_C - E_T}{k_B T} - \ln(X_n \sigma_n), \quad (1)$$

$$\ln(\tau_e v_{th,p} N_V) = \frac{E_T - E_V}{k_B T} - \ln(X_p \sigma_p). \quad (2)$$

where  $\tau_e$ ,  $N_C$ ,  $N_V$ ,  $E_C$ ,  $E_T$  and  $E_V$  are emission time constant, conduction band state density, valence band state density, conduction band, trap energy level and valence band, respectively.  $v_{th,n/p}$ ,  $X_{n/p}$  and  $\sigma_{n/p}$  represent thermal velocity, entropy factor and capture cross section for electron and hole, respectively. Hence, the  $E_a$  and  $\sigma$  can be extracted by the slope and y-axis intercept, separately. In addition, the trap density ( $N_T$ ) could be obtained by equation (3)<sup>2</sup>,

$$N_T = 2N_S \frac{\Delta C}{C_R}. \quad (3)$$

where  $N_S$  is the shallow donor concentration,  $C_R$  is the capacitance under reverse bias, while  $\Delta C$  represents the amplitude of transient capacitance.

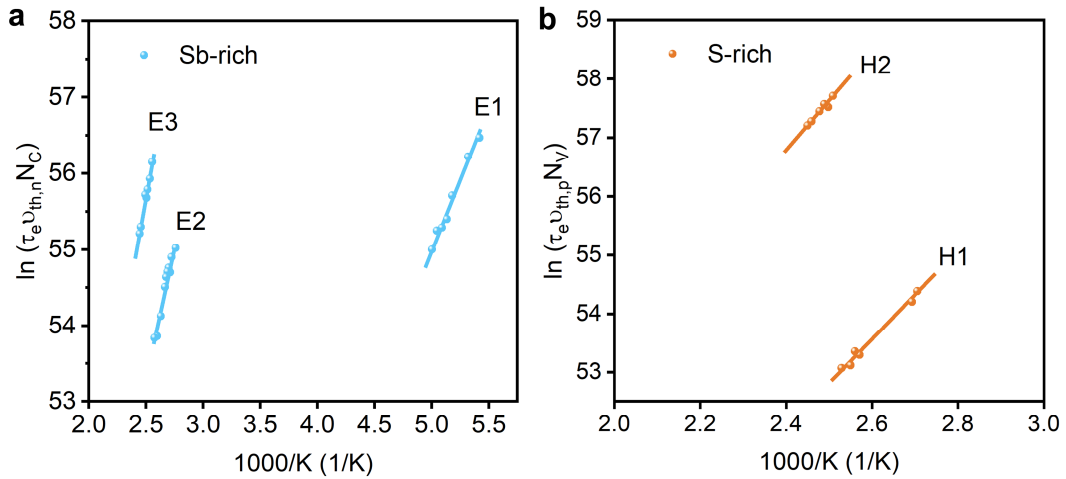

Supplementary Fig. 4 Arrhenius plots obtained from DLTS for Sb-rich (a) and S-rich (b) Sb<sub>2</sub>S<sub>3</sub>.

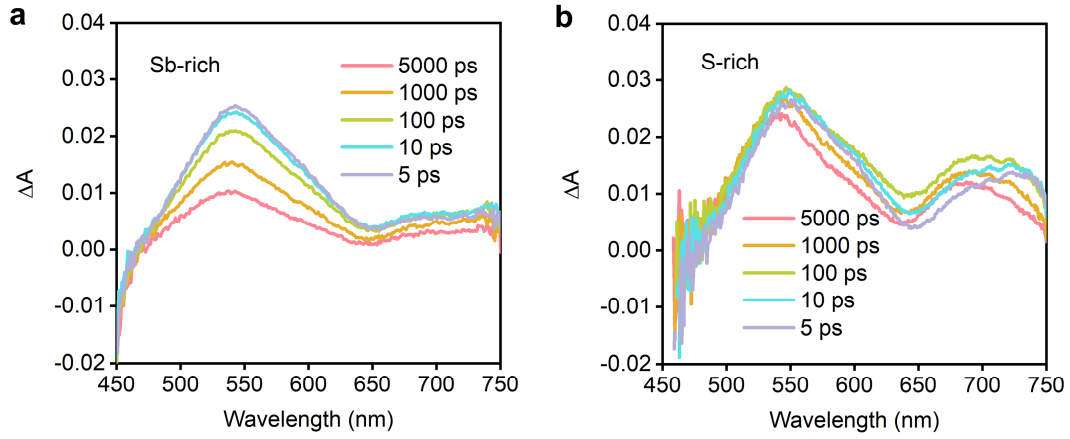

**Supplementary Fig. 5** Carrier transport kinetics. **a, b**, TAS for Sb-rich and S-rich  $\text{Sb}_2\text{S}_3$  films on soda-lime glass tracked at 5, 10, 100, 1000 and 5000 ps after pulsed excitation at 400 nm.

**Supplementary reference.**

1. Yin, Y. et al. Composition engineering of  $\text{Sb}_2\text{S}_3$  film enabling high performance solar cells. *Sci. Bull.* **64**, 136-141 (2019).
2. Lang, D. Deep-level transient spectroscopy: A new method to characterize traps in semiconductors. *J. Appl. Phys.* **45**, 3023-3032 (1974).
